# Supplementary material for: Proteome heterogeneity and malignancy detection in pancreatic cyst fluids
Source: PubMed Central journal article supplement (PMC8382978; doi:10.1002/ctm2.506), 2021-08-23
Supplement: CTM2-11-e506-s002.pdf [file CTM2-11-e506-s002.pdf]

**Supplemental Table 1.** Demographic and clinical data of IPMN/MCN study cohort

| Specimen Type       | Diagnosis                            | Cancer stage - if applicable | Gender | Race                  | Age | Smoker status | Diabetic |
|---------------------|--------------------------------------|------------------------------|--------|-----------------------|-----|---------------|----------|
| Surgical Cyst Fluid | IPMN with LGD                        |                              | Female | White                 | 65  | Past          | No       |
| EUS Cyst Fluid      | IPMN with LGD                        |                              | Male   | White                 | 77  | Never         | Yes      |
| EUS Cyst Fluid      | IPMN with LGD                        |                              | Female | Black/African America | 82  | Past          | Yes      |
| Surgical Cyst Fluid | IPMN degenerated into adenocarcinoma | T1N0M0; Stage IA surg        | Female | White                 | 84  | Never         | Yes      |
| Surgical Cyst Fluid | MCN with HGD                         |                              | Female | White                 | 58  | unknown       | unknown  |
| EUS Cyst Fluid      | MCN with LGD                         |                              | Male   | White                 | 56  | Never         | No       |
| Surgical Cyst Fluid | IPMN degenerated into adenocarcinoma | T1N0M0; Stage IA surg        | Male   | White                 | 65  | Past          | No       |
| EUS Cyst Fluid      | IPMN with LGD                        |                              | Male   | White                 | 61  | Never         | No       |
| Surgical Cyst Fluid | IPMN with HGD                        |                              | Male   | White                 | 67  | Past          | No       |
| Surgical Cyst Fluid | IPMN with HGD                        |                              | Male   | White                 | 74  | Never         | No       |
| Surgical Cyst Fluid | IPMN with LGD                        |                              | Female | White                 | 75  | Never         | Yes      |
| Surgical Cyst Fluid | IPMN degenerated into adenocarcinoma | T1N0M0; Stage IA surg        | Female | White                 | 69  | Past          | Yes      |
| Surgical Cyst Fluid | MCN with LGD                         |                              | Female | White                 | 56  | Never         | Yes      |
| EUS Cyst Fluid      | MCN with LGD                         |                              | Female | White                 | 47  | Current       | No       |
| Surgical Cyst Fluid | MCNwith LGD                          |                              | Female | White                 | 42  | Current       | Yes      |
| Surgical Cyst Fluid | MCN degenerated into adenocarcinoma  | T1N0M0; Stage IA surg        | Female | White                 | 34  | Never         | No       |
| EUS Cyst Fluid      | MCN with LGD                         |                              | Female | Black/African America | 48  | Never         | No       |
| Surgical Cyst Fluid | IPMN degenerated into adenocarcinoma | T3N1M0; Stage IIB surg       | Male   | White                 | 78  | Past          | Yes      |
| Surgical Cyst Fluid | IPMN with LGD                        |                              | Female | White                 | 51  | Past          | No       |
| Surgical Cyst Fluid | MCN with HGD                         |                              | Female | White                 | 42  | Never         | No       |

| Term                              | Count | %          | PValue   | FDR      |
|-----------------------------------|-------|------------|----------|----------|
| GO:0006508~proteolysis            | 155   | 6.31879331 | 1.11E-24 | 2.12E-21 |
| GO:0007155~cell adhesion          | 119   | 4.85120261 | 1.01E-12 | 1.94E-09 |
| GO:0045087~innate immune response | 101   | 4.11740726 | 1.80E-08 | 3.46E-05 |

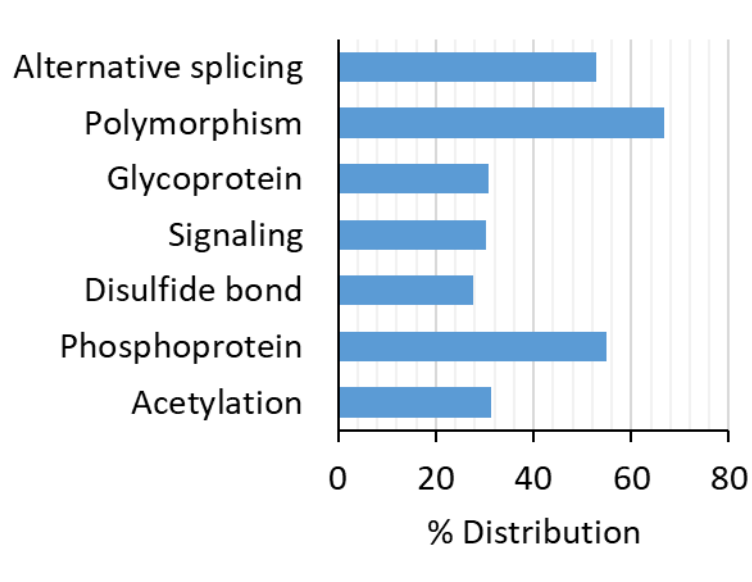

**Supplemental Figure 1.** Functional annotation using DAVID (The Database for Annotation, Visualization and Integrated Discovery).

Ref: Huang DW, Sherman BT, Lempicki RA. Systematic and integrative analysis of large gene lists using DAVID Bioinformatics Resources. *Nature Protoc.* 2009;4(1):44-57.

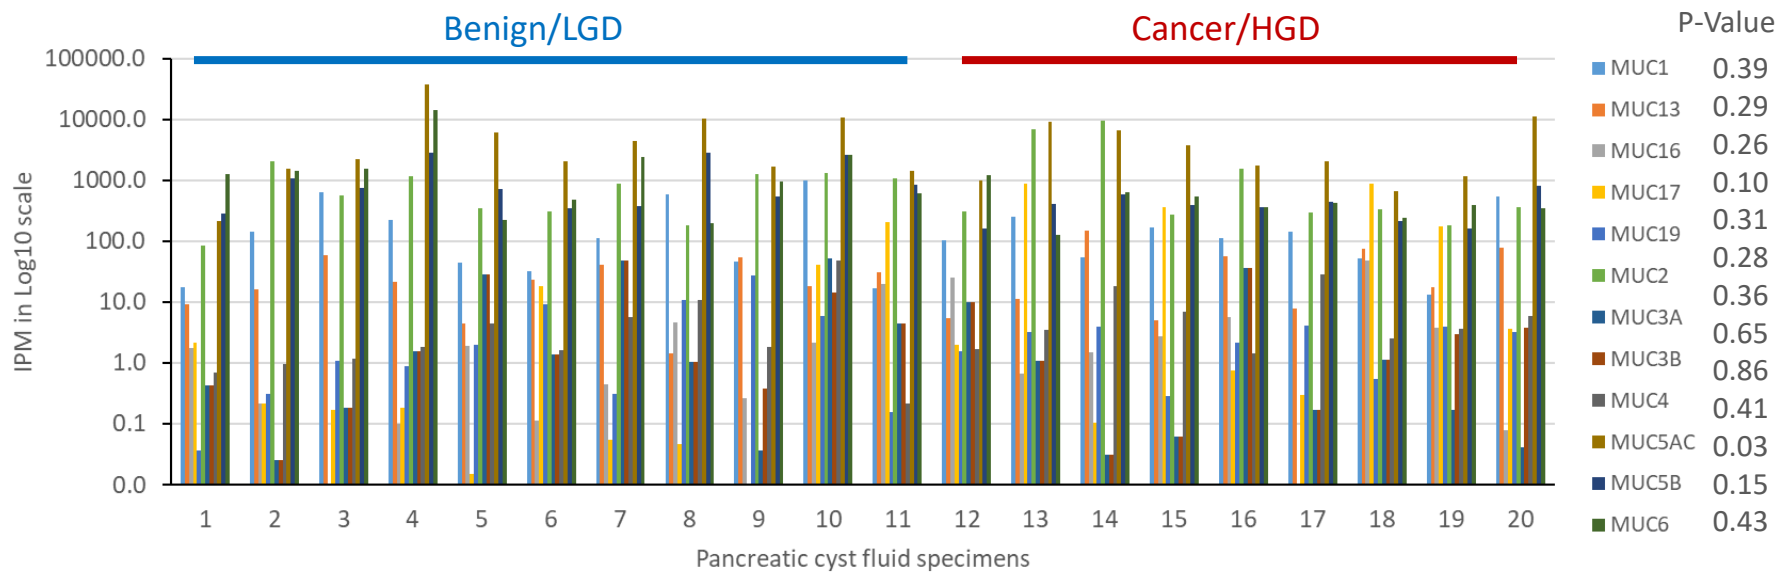

**Supplemental Figure 2.** The levels of mucins in the pancreatic cyst fluid specimens.

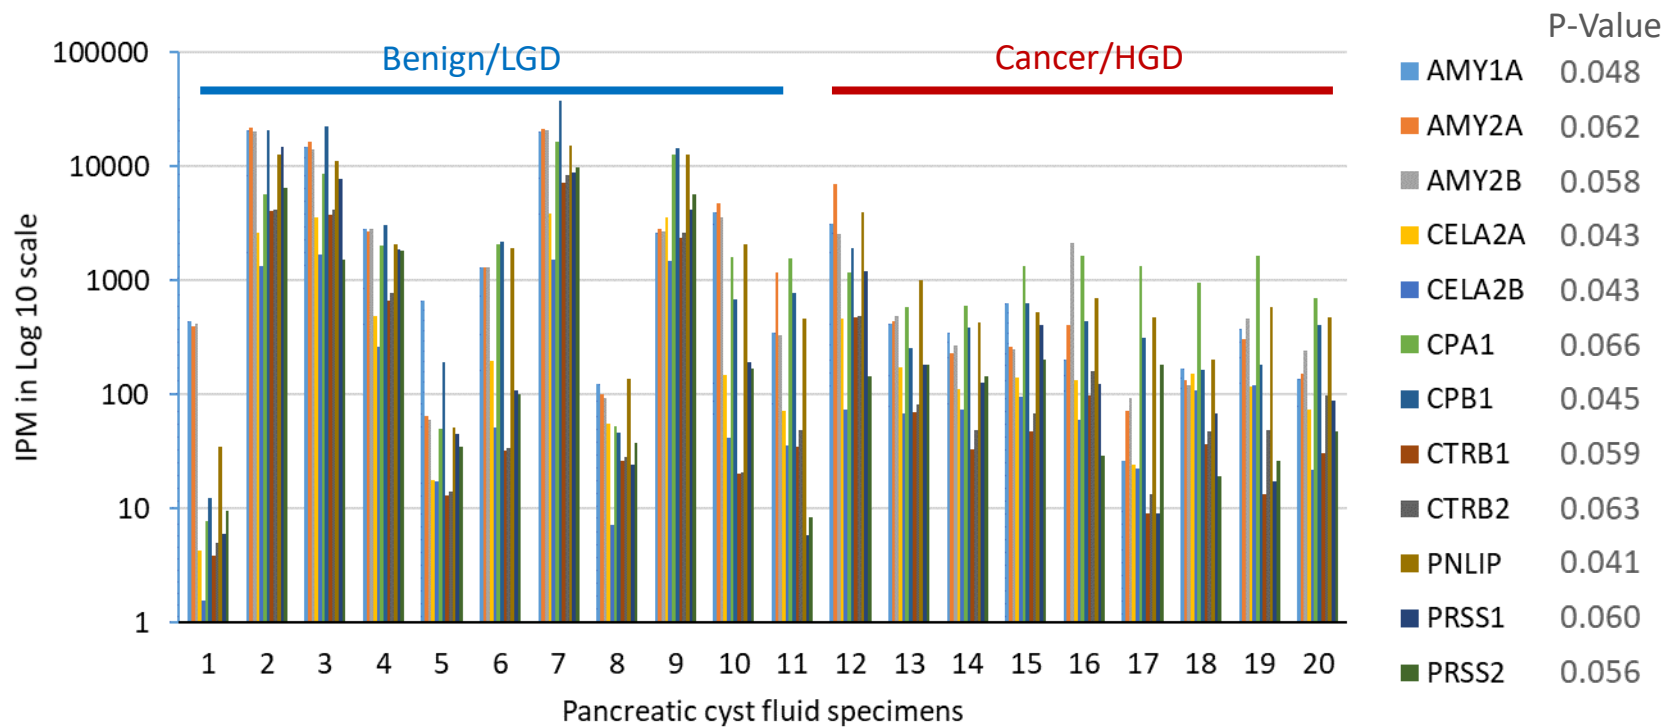

**Supplemental Figure 3.** The levels of individual enzymes in the pancreatic cyst fluid specimens.

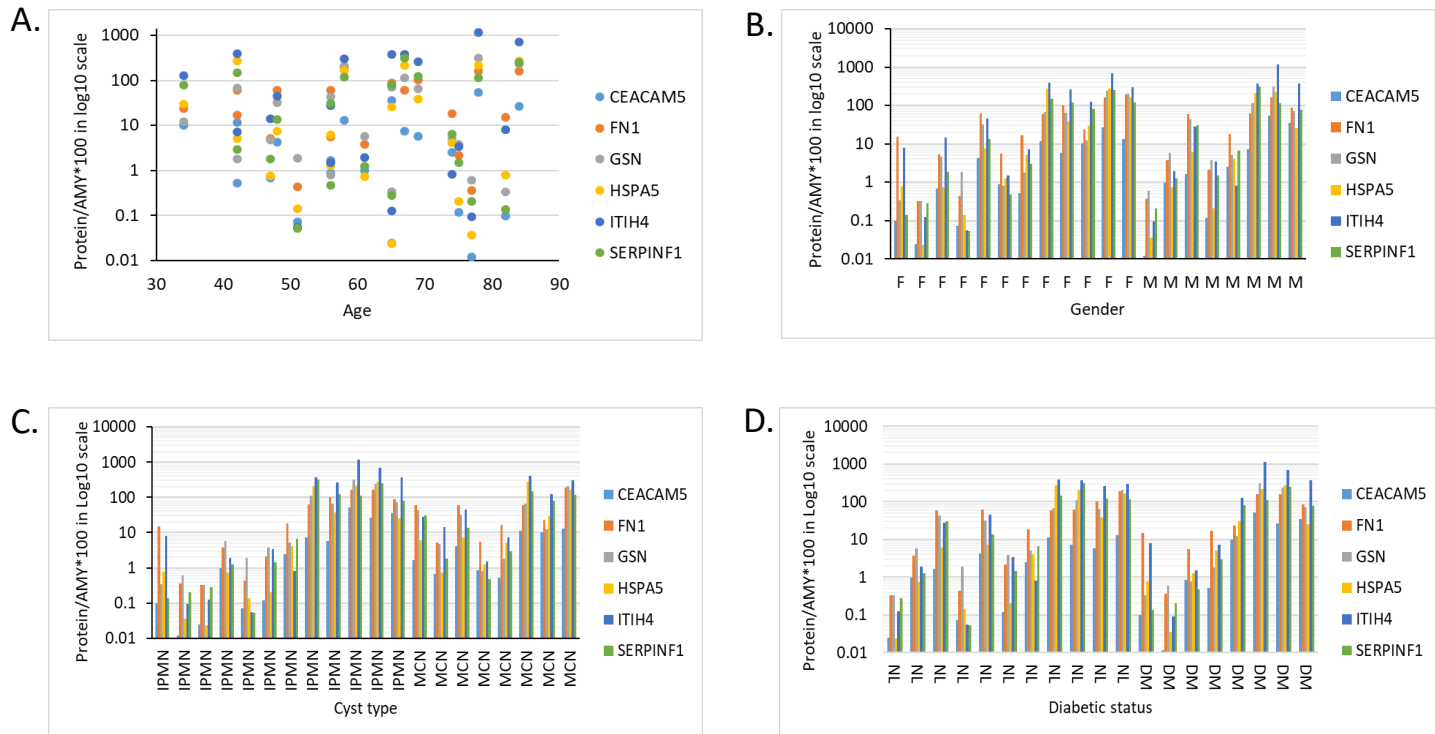

**Supplemental Figure 4.** The quantification of amylases-normalized CEACAM5, FN1, GSN, HSPA5, ITIH4 and SERPINF1 versus patients' age (A), gender (B), mucinous cyst types (C), or diabetic status (D). No significant correlations were observed between ratio-based quantifications and the patients age, gender mucinous cyst types, or diabetic status.

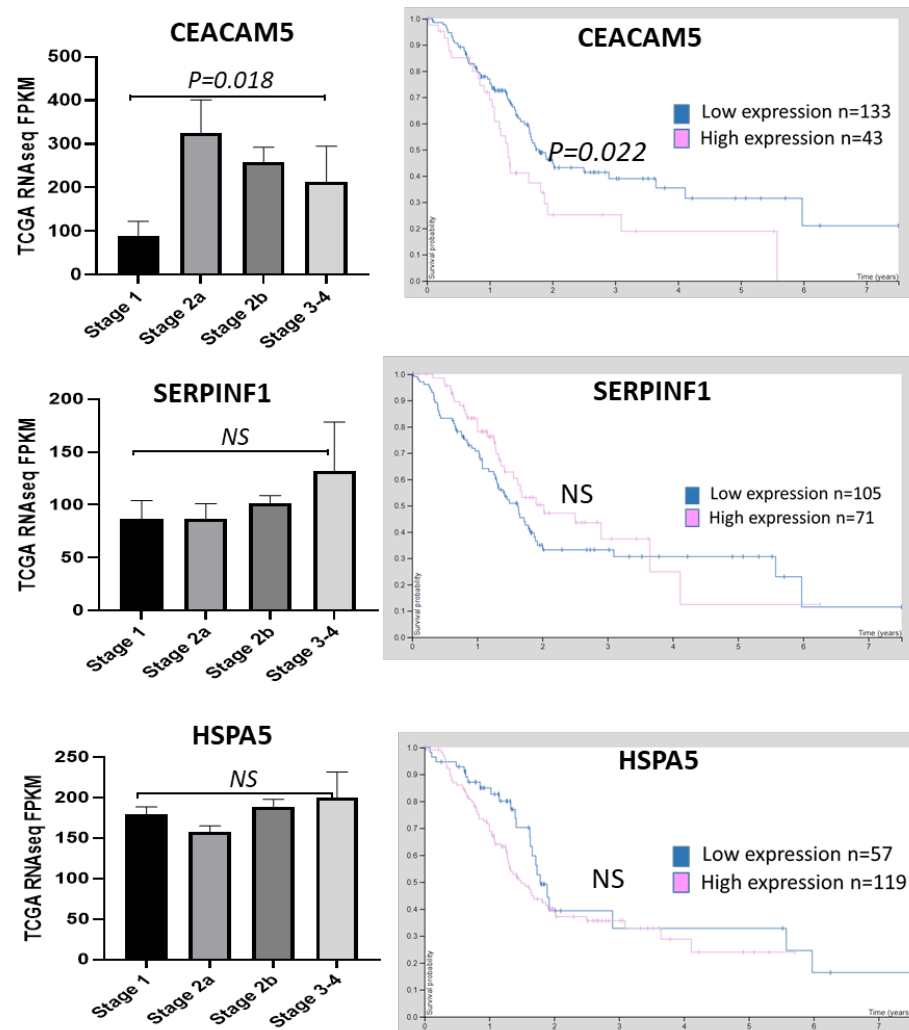

**Supplemental Figure 5.** Tissue RNA expression analysis in pancreatic cancer using TCGA database for CEACAM5, SERPINF1 and HSPA5. Using the TCGA RNA-seq dataset available from v19.1 ProteinAtlas.org, the RNA expression of CEACAM5, SERPINF1 and HSPA5 were evaluated, and only CEACAM5 was significantly linked to tumor stages and/or patient survival time. NS: statistically non-significant.
